---

Corrigendum

## Nanopype: a modular and scalable nanopore data processing pipeline

Pay Giesselmann<sup>1</sup>, Sara Hetzel<sup>1</sup>, Franz-Josef Müller<sup>1,2</sup>,  
Alexander Meissner<sup>1</sup> and Helene Kretzmer<sup>1</sup>

<sup>1</sup>Department of Genome Regulation, Max Planck Institute for Molecular Genetics, Berlin, Germany and

<sup>2</sup>Department of Psychiatry and Psychotherapy, Zentrum für Integrative Psychiatrie gGmbH, Universitätsklinikum Schleswig-Holstein, Campus Kiel, Kiel, Germany

---

*Bioinformatics* (2019), doi: 10.1093/bioinformatics/btz461

In the above article the second affiliation for the third author, Franz-Josef Müller, was inadvertently published as ‘Department of Psychiatry and Psychotherapy, Zentrum für Integrative Psychiatrie

gGmbH, Universitätsklinikum Schleswig-Holstein, Campus Kiel, Kiel, Germany.’ The name of the University has now been corrected to read ‘Universitätsklinikum Schleswig-Holstein.’

The author apologises for the error.
